# Supplementary material for: From the inside-out: leached metal impurities in multiwall carbon nanotubes for purification or electrocatalysis
Source: Royal Society of Chemistry journal article supplement (doi:10.1039/c7ta11257b), 2018-01-01
Supplement: c7ta11257b1.pdf [file c7ta11257b1.pdf]

Electronic Supplementary Information

*Electronic Supplementary Information (ESI)*

*for*

**From the Inside-Out: Leached of Metal Impurities in Multiwall Carbon Nanotubes for Purification or Electrocatalysis**

Bryan H. R. Suryanto<sup>a</sup>, Tim Fang<sup>a</sup>, Soshan Cheong<sup>b</sup>, Richard D. Tilley<sup>a,b</sup> and Chuan Zhao<sup>a,\*</sup>

<sup>a</sup> *School of Chemistry, The University of New South Wales, Kensington, NSW, 2052, Australia.*

<sup>b</sup> *Mark Wainwright Analytical Centre, The University of New South Wales, Kensington, NSW, 2052, Australia*

\*Corresponding author e-mail: [chuan.zhao@unsw.edu.au](mailto:chuan.zhao@unsw.edu.au)

## 1. Supplementary data

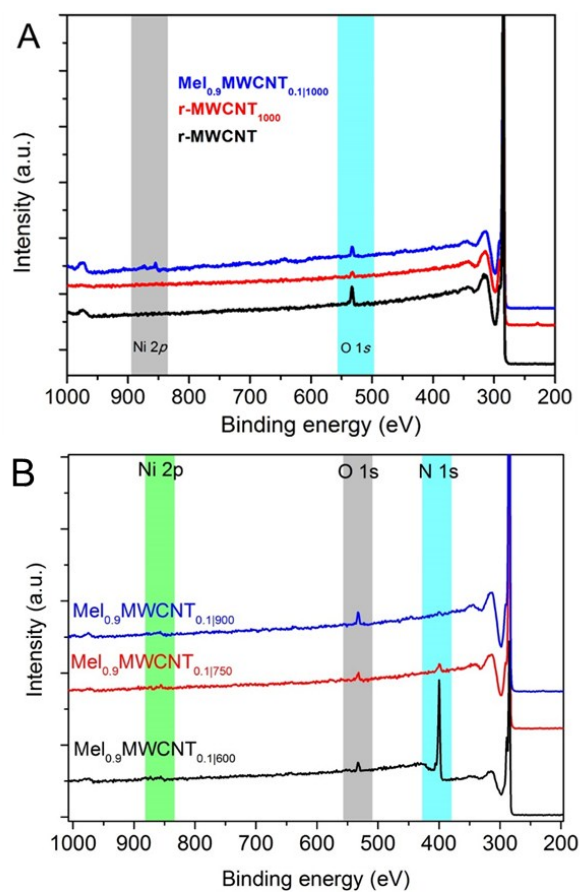

**Figure S1.** XPS Survey scan of (A)  $\text{r-MWCNT}$ ,  $\text{r-MWCNT}_{1000}$  and  $\text{MeI}_{0.9}\text{MWCNT}_{0.1|1000}$ , and (B)  $\text{MeI}_{0.9}\text{MWCNT}_{0.1|T}$  pyrolyzed at various temperatures.

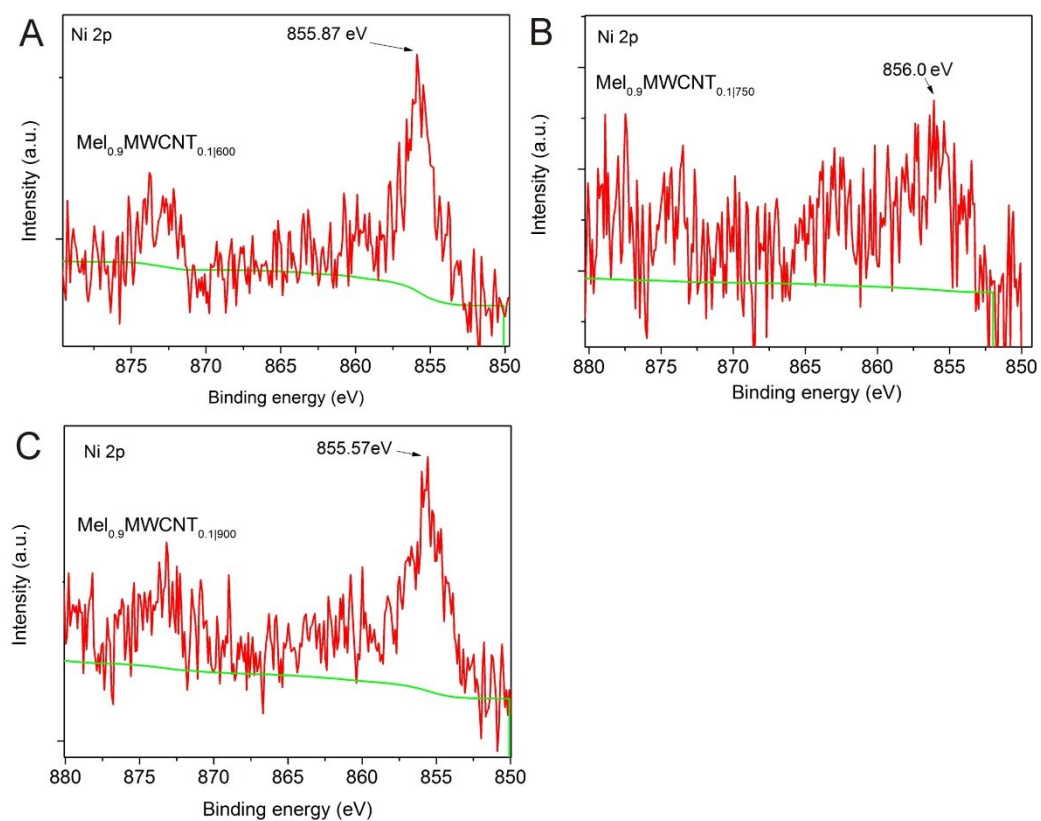

**Figure S2.** High resolution Ni 2p XPS scan for Mel<sub>0.9</sub>MWCNT<sub>0.1T</sub> pyrolyzed at various temperatures (A) 600°C, (B) 750°C and (C) 900°C.

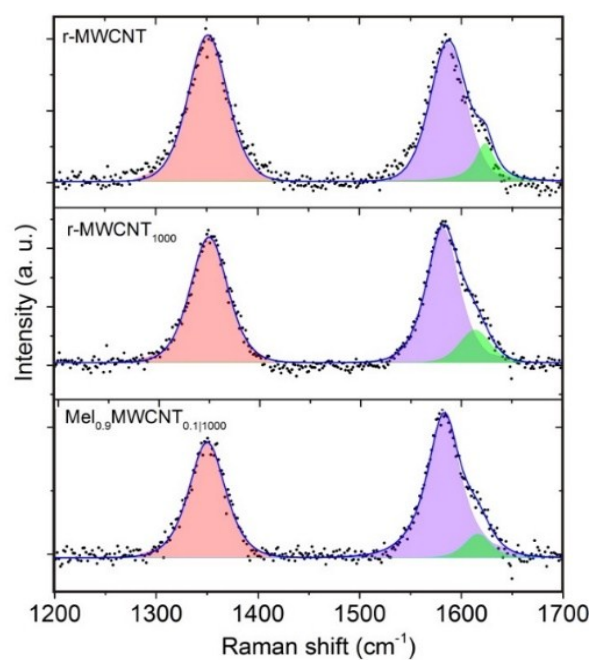

**Figure S3.** Raman spectrum of MeI<sub>0.9</sub>MWCNT<sub>0.1|1000</sub>, r-MWCNT<sub>1000</sub> and r-MWCNT, the red and green shaded peaks correspond to defect sites, the purple shaded peaks correspond to sp<sup>2</sup>-hybridized C-C bonds.

**Table S1. Detection of metal impurities amount (Ni, Fe and Co) by ICP-MS.**

| Sample                                                    | Purification procedure | Metal content (ppm) |     |    |       |
|-----------------------------------------------------------|------------------------|---------------------|-----|----|-------|
|                                                           |                        | Ni                  | Fe  | Co | Total |
| raw MWCNT                                                 | As received            | 9907                | 102 | 71 | 10080 |
| r-MWCNT                                                   | 5 M HCl, 120°C         | 9049                | 104 | 66 | 9219  |
| r-MWCNT <sub>1000</sub>                                   | 1000°C, 5 M HCl, 120°C | 5204                | 19  | 44 | 5267  |
| Mel <sub>0.9</sub> MWCNT <sub>0.1 1000</sub> <sup>1</sup> | 1000°C, 5 M HCl, 120°C | 901                 | 18  | 7  | 926   |
| Mel <sub>0.9</sub> MWCNT <sub>0.1 1000</sub> <sup>2</sup> | 1000°C, 5 M HCl, 120°C | 703                 | 14  | 7  | 724   |
| Mel <sub>0.9</sub> MWCNT <sub>0.1 1000</sub> <sup>3</sup> | 1000°C, 5 M HCl, 120°C | 294                 | 13  | <1 | 308   |
| Mel <sub>0.9</sub> MWCNT <sub>0.1 1000</sub> <sup>4</sup> | 1000°C, 5 M HCl, 120°C | 107                 | 13  | <1 | 121   |

N.B: Mel<sub>0.9</sub>MWCNT<sub>0.1|1000</sub><sup>y</sup>, y corresponds to the number of melamine and HCl purification cycles. The uncertainty for ICP-MS analysis is  $\pm 1.00\%$ .

**Table S2. The amount of mass yield percentage of pyrolysed  $\text{MeI}_{(1-x)}\text{MWCNT}_{x|T}$  and its associated N and Ni contents by XPS detection.**

| <b>Sample</b>                             | <b>Mass Yield (%)</b> | <b>N 1s (at.%)</b> | <b>Ni 2p(at.%)</b> |
|-------------------------------------------|-----------------------|--------------------|--------------------|
| $\text{MeI}_{0.9}\text{MWCNT}_{0.1 1000}$ | 96.58                 | N.D.               | 0.10               |
| $\text{MeI}_{0.9}\text{MWCNT}_{0.1 900}$  | 96.15                 | 0.47               | 0.21               |
| $\text{MeI}_{0.9}\text{MWCNT}_{0.1 750}$  | 98.11                 | 1.66               | 0.12               |
| $\text{MeI}_{0.9}\text{MWCNT}_{0.1 600}$  | 200.87                | 25.74              | 0.15               |

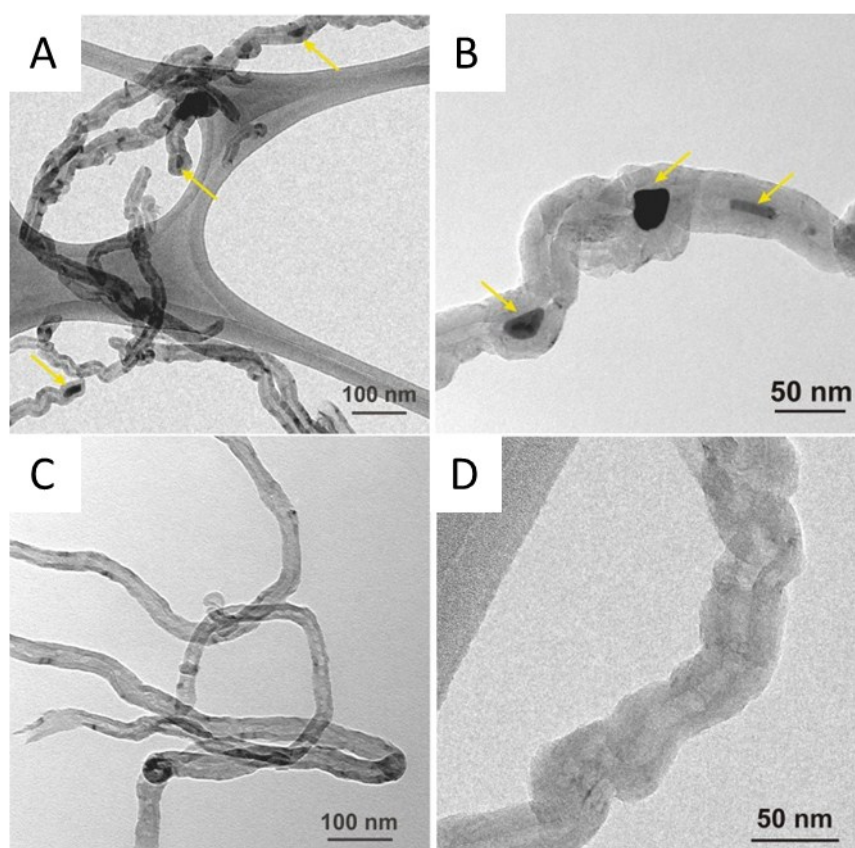

**Figure S4.** Transmission electron microscopy (TEM) characterization of MWCNTs, (A,B) r-MWCNT<sub>1000</sub>, (C,D) acid purified Mel<sub>0.9</sub>MWCNT<sub>0.1|1000</sub>. The yellow arrows in the figures point to heavier elements as indicated by the darker contrast in the images.

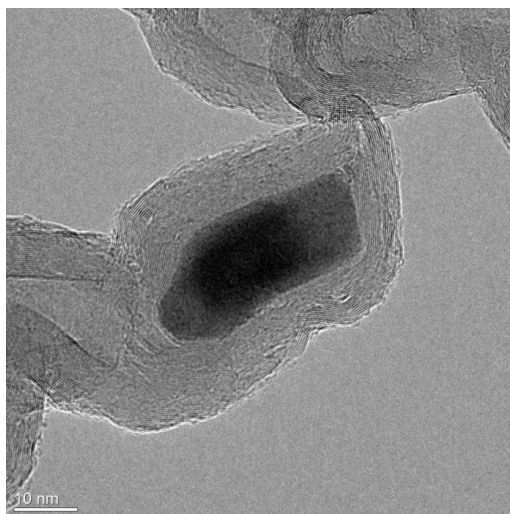

**Figure S5.** High resolution TEM shows the full encapsulation of Ni particles in MWCNT.



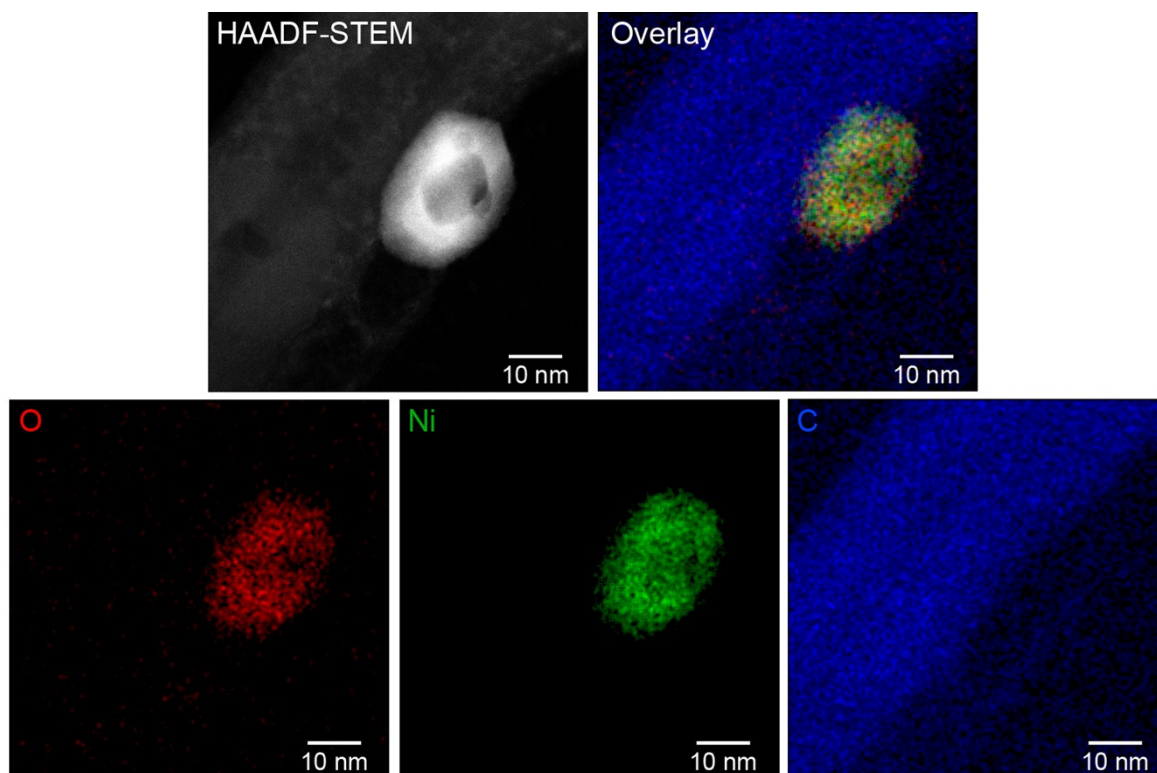

**Figure S6.** High-angle annular dark-field (HAADF)-STEM image and STEM-EDS elemental mapping of the leached metallic impurities *via* the leak mode, the same CNT as shown in Fig 2B. The false color overlay and maps of O K-edge (red), Ni K-edge (green) and C K-edge (blue) clearly show a nickel oxide nanoparticle on the surface of a MWCNT.

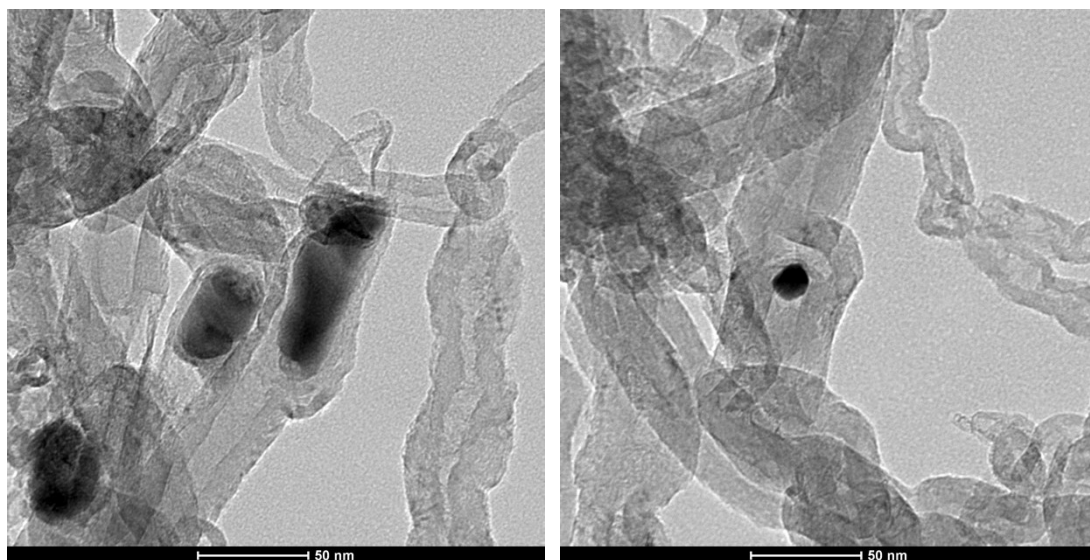

**Figure S7.** The typical TEM images of the Urea<sub>0.9</sub>MWCNT<sub>0.1/1000</sub>
